# Supplementary material for: HAase/GSH dual-responsive mesoporous organosilica nanoparticles for synergistic photodynamic/photothermal/pharmacological antibacterial therapy
Source: Royal Society of Chemistry journal article supplement (doi:10.1039/d4nj03287j), 2024-01-01
Supplement: d4nj03287j1.pdf [file d4nj03287j1.pdf]

## Supporting Information

### **HAase/GSH dual-responsive mesoporous organosilica nanoparticle for synergistic photodynamic/photothermal/pharmacological antibacterial therapy**

Wei Guo,<sup>a</sup> Yunhan Huang,<sup>a</sup> Jingrui Chang,<sup>a</sup> Xinyu Wang<sup>a</sup> and Bo Lu<sup>\*a</sup>

<sup>a</sup> School of Chemistry, Chemical Engineering and Life Sciences, Wuhan University of Technology, Wuhan, 430070, PR China.

\*Corresponding author: School of Chemistry, Chemical Engineering and Life Sciences, Wuhan University of Technology, Wuhan, 430070, PR China.

E-mail: [lvb@whut.edu.cn](mailto:lvb@whut.edu.cn)

Tel & Fax: 086-027-87749300

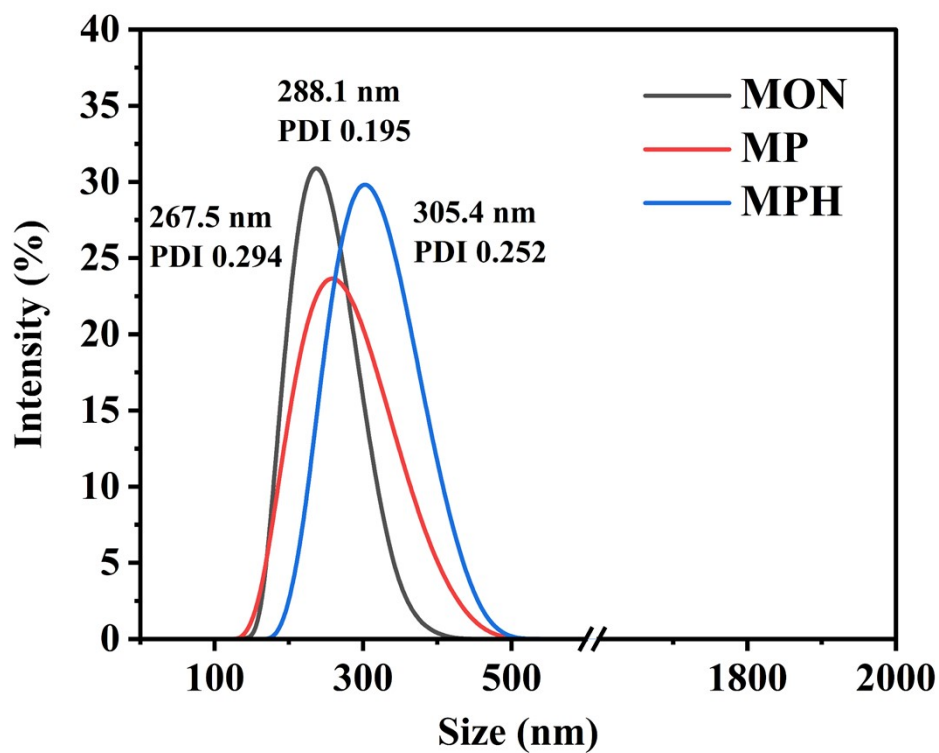

Fig. S1. The average hydrated particle diameter distributions of MON, MP and MPH

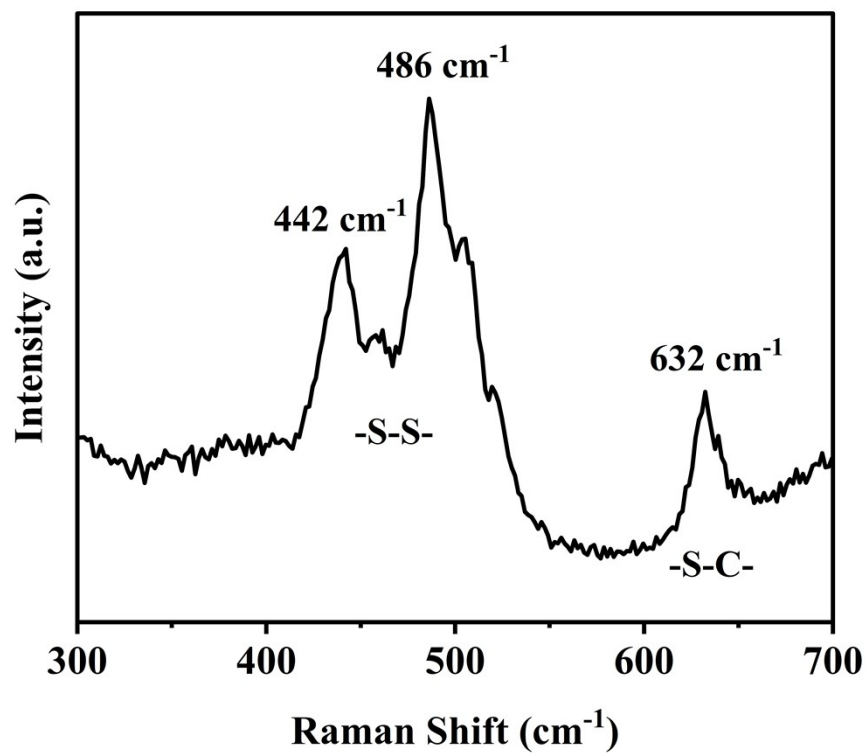

Fig. S2. Raman Spectrogram of MON

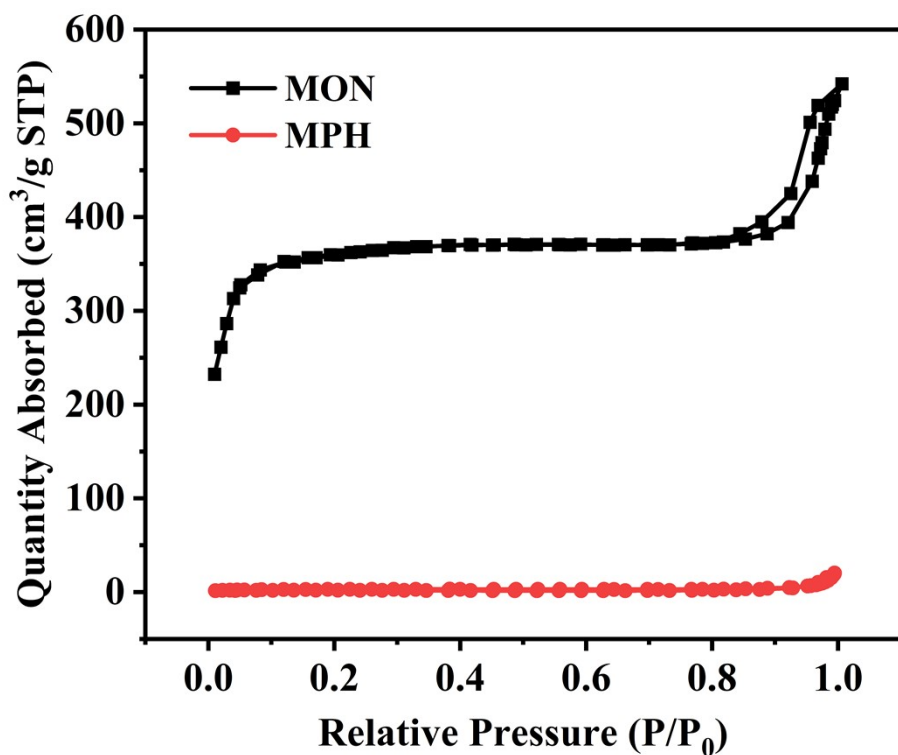

Fig. S3. BET N<sub>2</sub> adsorption/desorption isotherms

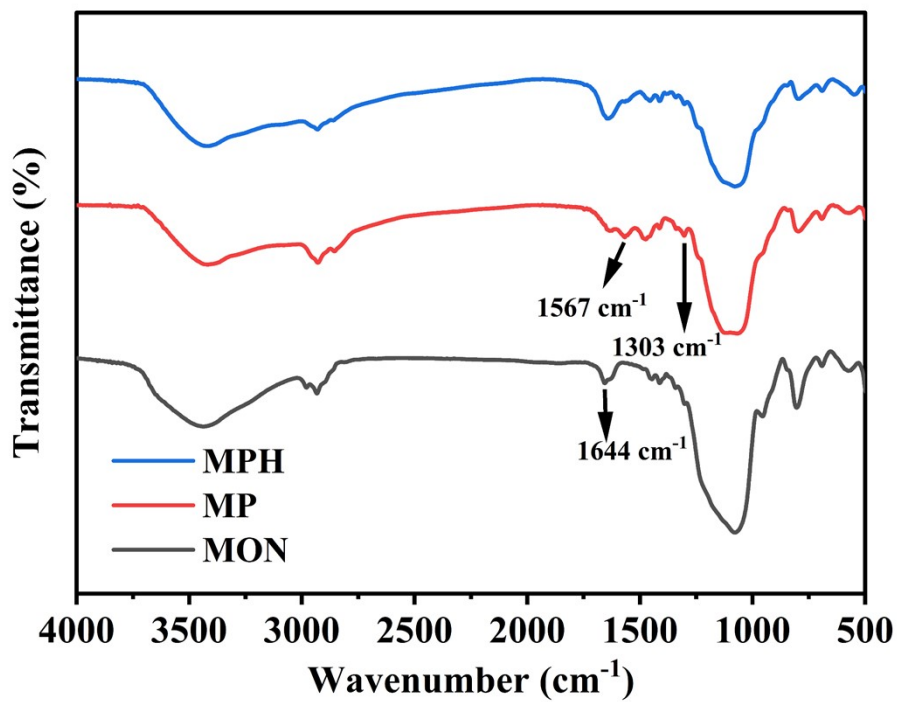

Fig. S4. Infrared spectra of different nanoparticles

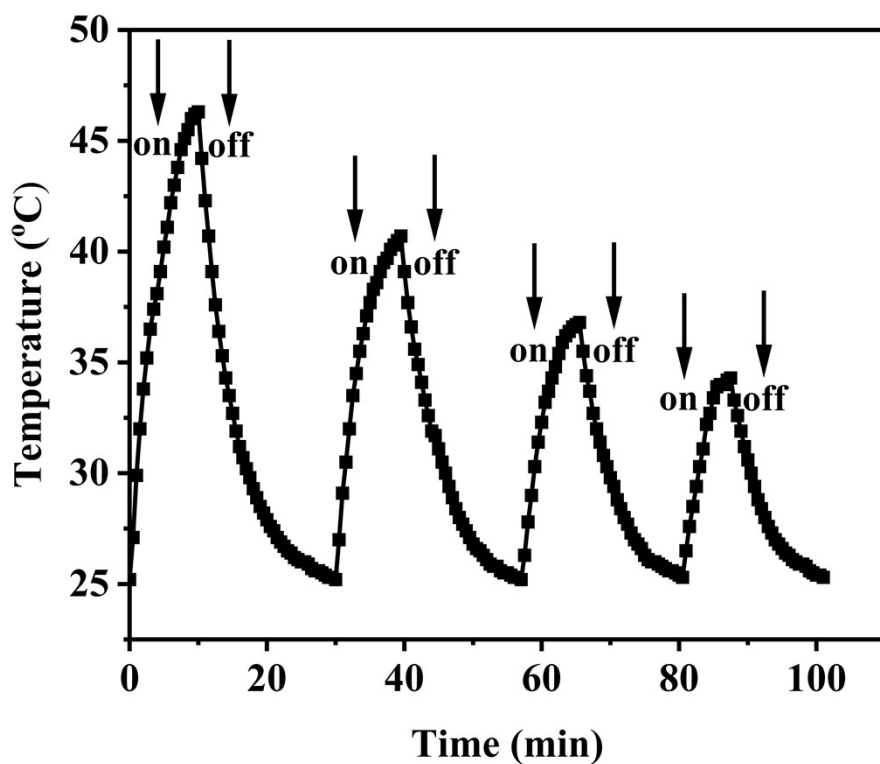

Fig. S5. Irradiation-cooling curve of ICG under  $2 \text{ W} \cdot \text{cm}^{-2}$  808 nm laser irradiation

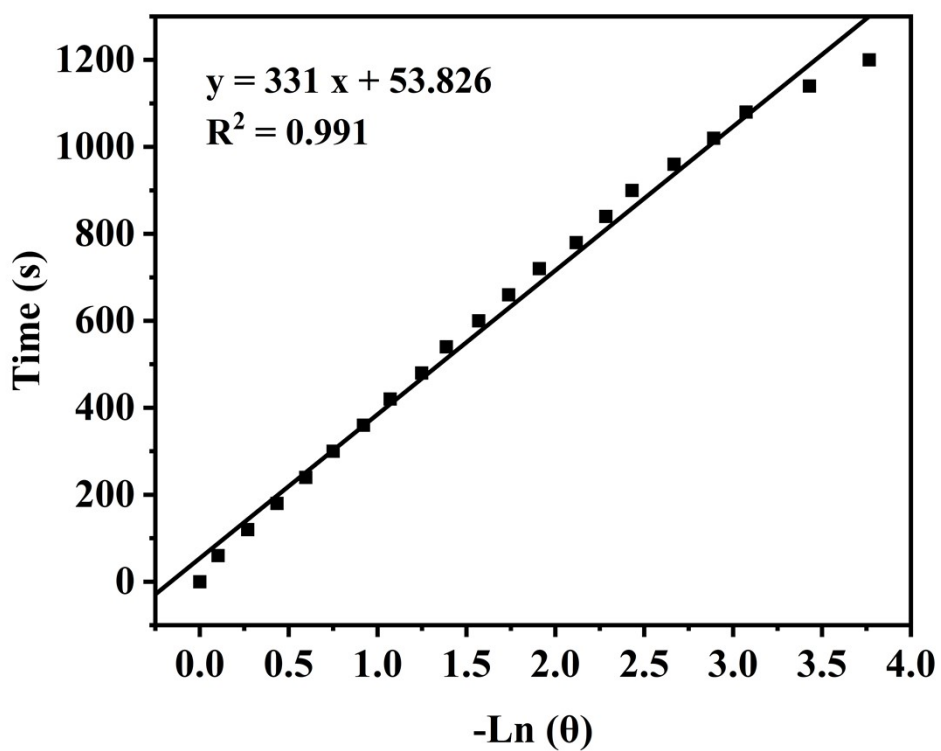

Fig. S6. Linear relationship between time (s) with  $-\text{Ln}(\theta)$ .

| MIC ( $\mu\text{g}\cdot\text{mL}^{-1}$ ) | <i>S. aureus</i> | <i>E. coli</i> |
|------------------------------------------|------------------|----------------|
| ICMPH                                    | 40               | 20             |

**Table S1.** MIC of ICMPH against *S. aureus* and *E. coli* (n = 3)

| IC <sub>50</sub> ( $\mu\text{g}\cdot\text{mL}^{-1}$ ) | MON    | MON + Laser | MPH    | MPH + Laser |
|-------------------------------------------------------|--------|-------------|--------|-------------|
| L929 cells                                            | 226.41 | 260.51      | 291.22 | 340.20      |

**Table S2.** IC<sub>50</sub> values of various samples on L929 cells for 24 h (n = 3)

| IC <sub>50</sub> ( $\mu\text{g}\cdot\text{mL}^{-1}$ ) | MON    | MON + Laser | MPH    | MPH + Laser |
|-------------------------------------------------------|--------|-------------|--------|-------------|
| L929 cells                                            | 187.95 | 224.45      | 222.37 | 279.28      |

**Table S3.** IC<sub>50</sub> values of various samples on L929 cells for 48 h (n = 3)
